# Supplementary material for: Human Norovirus Infection in Dogs, Thailand
Source: PubMed Central journal article supplement (PMC6986825; doi:10.3201/eid2602.191151), 2020-02
Supplement: 19-1151-Techapp-s1.pdf [file 19-1151-Techapp-s1.pdf]

# Human Norovirus Infection in Dogs, Thailand

## Appendix

### Infection in Dogs

During July–September 2018, the Center of Excellence for Emerging and Re-emerging Diseases in Animals at Chulalongkorn University (Bangkok, Thailand) investigated a suspected outbreak of norovirus infection in dogs that had fever, acute vomiting, and watery diarrhea in a small-scale dog kennel. Epidemiologic investigation, sample collection, and laboratory diagnosis were conducted to determine the cause of the outbreak. Information from the outbreak investigation showed that 2 weeks before reporting of cases in animals, 2 children (8 months and 2 years of age) who lived on the kennel premises had been hospitalized on July 18, 2018 because of vomiting and watery diarrhea. These children recovered within 1 week. During hospitalization, human cases were diagnosed and confirmed as norovirus infection by using a rapid test kit. Animal sample collection and testing were performed under the Chulalongkorn University Animal Care and Use Committee Protocol (Institutional Animal Care and Use Committee no. 1731074). Human sample collection and testing were performed at the Center of Excellence for Clinical Virology under the Institutional Review Board of Chulalongkorn University Hospital protocol for human study (Institutional Review Board no. 634/59).

### Identification of Viruses

Over 4 visits during July–September 2018, we collected 75 samples: 4 stool samples from 2 children (8 months and 2 years of age) and 71 rectal swab samples from 18 adult dogs and 6 puppies. We identified noroviruses by using an RT-PCR specific for the RNA dependent RNA polymerase gene (1,2). Because dogs showed clinical signs similar to those for canine enteric diseases, all samples were also examined for canine parvovirus type 2, rotavirus A, canine coronavirus, and canine distemper to rule out other canine enteric diseases (3–7). We extracted virus RNAs from 10% stool suspensions in phosphate-buffered saline, pH 7.2, and from rectal swab samples by using the QIA-symphony DSP Viral/Pathogen Mini Kit (QIAGEN,

<https://www.qiagen.com>) following the manufacturer's instructions. The virus RNA was stored at  $-80^{\circ}\text{C}$  until use.

A PCR for norovirus identification was conducted as described (1,2). We use a set of oligonucleotide primers (Appendix Table 4). A 1-step reverse transcription PCR (RT-PCR) (Invitrogen, <https://www.thermofisher.com>) was conducted in a final volume of 25  $\mu\text{L}$  containing 3  $\mu\text{L}$  of template RNA, 12.5  $\mu\text{L}$  of 2 $\times$  reaction mixture, 0.6  $\mu\text{L}$  of 10  $\mu\text{mol/L}$  of forward (F4895) and reverse (R5591) primers, 1.2  $\mu\text{L}$  of SuperScript III reverse transcriptase (Invitrogen), and distilled water. The RT-PCR procedure included a reverse transcription step at  $55^{\circ}\text{C}$  for 30 min; an initial denaturation step at  $94^{\circ}\text{C}$  for 2 min; followed by 40 cycles of denaturation at  $94^{\circ}\text{C}$  for 30 s, annealing at  $50^{\circ}\text{C}$  for 30 s, and extension at  $68^{\circ}\text{C}$  for 1 min; and final extension step at  $68^{\circ}\text{C}$  for 6 min. To confirm the presence of noroviruses, 4  $\mu\text{L}$  PCR product was subjected to electrophoresis on a 1.5% agarose gel, with RedSafe dye (Bulldog Bio, <https://www.bulldog-bio.com>), at 100 V for 45 min. The amplification product was visualized on a UV transilluminator. The expected size of the norovirus-positive amplified product was 493 bp.

We conducted a 1-step real-time RT-PCR for norovirus identification as described (8,9). This real-time RT-PCR was conducted by using the TaqMan Fast Virus 1-step real-time RT-PCR (Thermo Fisher Scientific, <https://www.thermofisher.com>) with specific primers and probe to GI and GII noroviruses was conducted in a final volume of 25  $\mu\text{L}$  containing 5  $\mu\text{L}$  of template RNA, 1 $\times$  Master Mix, 0.25  $\mu\text{mol/L}$  GI forward and reverse primers, 0.125  $\mu\text{mol/L}$  of GI-JOE labeled probe, 0.25  $\mu\text{mol/L}$  GII forward and reverse primers, 0.125  $\mu\text{mol/L}$  of GII-FAM labeled probe, and distilled. This real-time RT-PCR included a reverse transcription step at  $50^{\circ}\text{C}$  for 10 min; an enzyme activation step at  $95^{\circ}\text{C}$  for 20 s; followed by 45 cycles of denaturation at  $95^{\circ}\text{C}$  for 3 s and annealing at  $60^{\circ}\text{C}$  for 30 s. A cycle threshold value  $<40$  was considered as indicating GI and GII positive.

### **Characterization of Viruses**

In this study, we selected 4 noroviruses from Thailand: including 2 from humans (CU21953 and CU21954) and 2 from dogs (CU21939 and CU21952) for whole-genome sequencing. Whole norovirus genomes were sequenced by using oligonucleotide primer sets previously described and new primer sets designed with Primer 3 Plus (Appendix Table 4)

(10,11). A 25  $\mu$ L RT-PCR mixture contained 3  $\mu$ L of template RNA, 12.5  $\mu$ L of 2 $\times$  reaction mixture, 0.6  $\mu$ L of 10  $\mu$ mol/L forward and reverse primers, 1.2  $\mu$ L of SuperScript III reverse transcriptase, and distilled water. The RT-PCR procedure included a reverse transcription step at 55°C for 30 min; an initial denaturation step at 94°C for 2 min; followed by 40 cycles of denaturation at 94°C for 30 s, annealing at 48–55°C for 30 s, and extension at 68°C for 2 min; and a final extension step at 68°C for 6 min. Amplicons were gel-purified and sequenced (First Base Laboratories, <http://www.firstbaselab.com>). Nucleotide sequences were assembled and validated by using SeqMan software version 5.03 (DNASTAR Inc., <https://www.dnastar.com>). Whole-genome sequences of noroviruses from Thailand were submitted to GenBank under accession nos. MK928496–9.

For pairwise comparisons and genetic analysis of noroviruses from Thailand, we aligned nucleotide sequences and deduced amino acids of noroviruses with reference noroviruses from GenBank by using MEGA version 7.026 (<https://www.megasoftware.net>) and MegAlign version 5.03 (DNASTAR Inc.) software. For phylogenetic analysis, we compared complete genome sequences of noroviruses from Thailand with those of reference noroviruses, including genogroups GI (n = 2), GII (n = 5), GIII (n = 3), GIV (n = 4), GV (n = 2), GVI (n = 2), and GVII (n = 2). We analyzed the partial open reading frame 1 of noroviruses from Thailand NoVs by comparison with reference GII noroviruses, including GII.P1 (n = 2; United States), GII.P4 (n = 25; Australia, Japan, Georgia, South Korea, the Netherlands, Taiwan, United Kingdom and United States), GII.P5 (n = 1; Japan), GII.P6 (n = 2; Japan and United States), GII.P7 (n = 5; Japan, the Netherlands, and United States), GII.P8 (n = 1; Japan), GII.P11 (n = 1; China), GII.P12 (n = 7; China, South Korea, and Japan), GII.P16 (n = 6; Germany, Japan, Russia, and United States), GII.P17 (n = 1; Hong Kong), GII.P18 (n = 1; United States), GII.P20 (n = 1; Germany), GII.P22 (n = 2; Japan), GII.P21 (n = 2; Japan and the Netherlands), GII.Pc (n = 1; United States), GII.Pe (n = 10; Australia, China, Japan, and Thailand), GII.Pg (n = 2; Australia and China), and outer group GI.P1 (n = 1; United States). We compared the partial open reading frame 2 ORF2 of noroviruses from Thailand with those of reference of GII noroviruses, including genogroups GII.1 (n = 1; United States), GII.2 (n = 1; United Kingdom), GII.3 (n = 3; Argentina, Canada, and the Netherlands), GII.4 (n = 40; Australia, Canada, China, Finland, Ireland, Japan, Netherlands, Thailand, United Kingdom, and United States), GII.5 (n = 1; United Kingdom), GII.6 (n = 22; China, Japan, Italy, Taiwan, United Kingdom, and United States),

GII.7 (n = 12; Japan, Netherlands, Germany, Italy, United Kingdom, and United States), GII.8 (n = 4; China, the Netherlands, and Russia), GII.9 (n = 1; United States), GII.10 (n = 1; Germany), GII.11 (n = 1; Japan), GII.12 (n = 1; United Kingdom), GII.13 (n = 18; China, Nepal, and United States), GII.14 (n = 14; Germany, Japan, and United States), GII.16 (n = 1; United States), GII.17 (n = 1; United States), GII.18 (n = 1; United States), GII.19 (n = 1; United States), GII.20 (n = 1; Germany), GII.21 (n = 18; Bhutan, China, Cambodia, Hong Kong, India, Iraq, Japan, South Korea, Russia, United Kingdom, and United States), GII.22 (n = 1; Japan), and outer groups; GI (n = 1; United States) and GVII (n = 1; Hong Kong). Phylogenetic analysis was performed using MEGA version 7.026 with the neighbor-joining algorithm and bootstrap analysis of 1,000 replications.

## References

1. Phumpholsup T, Chieochansin T, Vongpunsawad S, Vuthitanachot V, Payungporn S, Poovorawan Y. Human norovirus genogroup II recombinants in Thailand, 2009–2014. *Arch Virol*. 2015;160:2603–9. [PubMed https://doi.org/10.1007/s00705-015-2545-5](https://doi.org/10.1007/s00705-015-2545-5)
2. Kojima S, Kageyama T, Fukushi S, Hoshino FB, Shinohara M, Uchida K, et al. Genogroup-specific PCR primers for detection of Norwalk-like viruses. *J Virol Methods*. 2002;100:107–14. [PubMed https://doi.org/10.1016/S0166-0934\(01\)00404-9](https://doi.org/10.1016/S0166-0934(01)00404-9)
3. Buonavoglia C, Martella V, Pratelli A, Tempesta M, Cavalli A, Buonavoglia D, et al. Evidence for evolution of canine parvovirus type 2 in Italy. *J Gen Virol*. 2001;82:3021–5. [PubMed https://doi.org/10.1099/0022-1317-82-12-3021](https://doi.org/10.1099/0022-1317-82-12-3021)
4. Herrewegh AA, Smeenk I, Horzinek MC, Rottier PJ, de Groot RJ. Feline coronavirus type II strains 79-1683 and 79-1146 originate from a double recombination between feline coronavirus type I and canine coronavirus. *J Virol*. 1998;72:4508–14. [PubMed https://doi.org/10.1099/0022-1317-72-12-4508](https://doi.org/10.1099/0022-1317-72-12-4508)
5. Frisk AL, König M, Moritz A, Baumgärtner W. Detection of canine distemper virus nucleoprotein RNA by reverse transcription-PCR using serum, whole blood, and cerebrospinal fluid from dogs with distemper. *J Clin Microbiol*. 1999;37:3634–43. [PubMed https://doi.org/10.1128/JCM.37.12.3634-43.1999](https://doi.org/10.1128/JCM.37.12.3634-43.1999)
6. Mesquita JR, Barclay L, Nascimento MSJ, Vinjé J. Novel norovirus in dogs with diarrhea. *Emerg Infect Dis*. 2010;16:980–2. [PubMed https://doi.org/10.3201/eid1606.091861](https://doi.org/10.3201/eid1606.091861)

7. Gouvea V, Glass RI, Woods P, Taniguchi K, Clark HF, Forrester B, et al. Polymerase chain reaction amplification and typing of rotavirus nucleic acid from stool specimens. *J Clin Microbiol.* 1990;28:276–82. [PubMed](#)
8. Chuchaona W, Chansaenroj J, Wanlapakorn N, Vongpunsawad S, Poovorawan Y. Recombinant GII.Pe-GII.4 norovirus, Thailand, 2017–2018. *Emerg Infect Dis.* 2019;25:1612–4. [PubMed](#)  
<https://doi.org/10.3201/eid2508.190365>
9. Debbink K, Costantini V, Swanstrom J, Agnihothram S, Vinje J, Baric R, et al. Human norovirus detection and production, quantification, and storage of virus-like particles. *Curr Protoc Microbiol.* 2013;31: 15K 1 1–K1 45.
10. He Y, Jin M, Chen K, Zhang H, Yang H, Zhuo F, et al. Gastroenteritis outbreaks associated with the emergence of the new GII. 4 Sydney norovirus variant during the epidemic of 2012/13 in Shenzhen city, China. *PLoS One.* 2016;11:e0165880. [PubMed](#)  
<https://doi.org/10.1371/journal.pone.0165880>
11. Untergasser A, Cutcutache I, Koressaar T, Ye J, Faircloth BC, Remm M, et al. Primer3: new capabilities and interfaces. *Nucleic Acids Res.* 2012;40:e115. <https://doi.org/10.1093/nar/gks596>  
[PubMed](#)

**Appendix Table 1.** Characteristics of samples collected and examined from a dog kennel, Thailand, 2018\*

| Sample name          | Sample ID | Collection |     | Age  | Breed              | Sample      | Clinical sign   | NoV RT- | NoV real-time | CPV2 | RVA | CaCoV | CDV |
|----------------------|-----------|------------|-----|------|--------------------|-------------|-----------------|---------|---------------|------|-----|-------|-----|
|                      |           | date       | Sex |      |                    |             |                 | PCR     | RT-PCR        |      |     |       |     |
| First visit, n = 19  |           |            |     |      |                    |             |                 |         |               |      |     |       |     |
| Human 1              | CU21953†  | Jul 27     | M   | 2 y  | Not applicable     | Feces       | Soft stool      | +       | + (27.3)      | -    | -   | NA    | NA  |
| Human 2              | CU21954†  | Jul 27     | M   | 8 mo | Not applicable     | Feces       | Soft stool      | +       | + (20.5)      | -    | -   | NA    | NA  |
| Dog 1                | CU21936   | Jul 27     | F   | 6 mo | French bulldog     | Rectal swab | Asymptomatic    | -       | -             | -    | -   | +     | -   |
| Dog 2                | CU21937   | Jul 27     | M   | 6 mo | French bulldog     | Rectal swab | Asymptomatic    | -       | -             | -    | -   | -     | -   |
| Dog 3                | CU21938   | Jul 27     | F   | 2 y  | French bulldog     | Rectal swab | Asymptomatic    | -       | -             | -    | -   | -     | -   |
| Dog 4                | CU21939†  | Jul 27     | F   | 1 y  | French bulldog     | Rectal swab | Watery diarrhea | +       | + (29.7)      | -    | -   | -     | -   |
| Dog 5                | CU21940   | Jul 27     | F   | 3 y  | French bulldog     | Rectal swab | Asymptomatic    | -       | -             | -    | -   | -     | -   |
| Dog 6                | CU21941   | Jul 27     | F   | 1 y  | French bulldog     | Rectal swab | Asymptomatic    | -       | -             | -    | -   | -     | -   |
| Dog 7                | CU21942   | Jul 27     | F   | 1 y  | French bulldog     | Rectal swab | Asymptomatic    | -       | -             | -    | -   | +     | -   |
| Dog 8                | CU21943   | Jul 27     | F   | 1 y  | French bulldog     | Rectal swab | Asymptomatic    | -       | -             | -    | -   | +     | -   |
| Dog 9                | CU21944   | Jul 27     | F   | 1 y  | French bulldog     | Rectal swab | Asymptomatic    | -       | -             | -    | -   | +     | -   |
| Dog 10               | CU21945   | Jul 27     | F   | 1 y  | French bulldog     | Rectal swab | Asymptomatic    | -       | -             | -    | -   | -     | -   |
| Dog 11               | CU21946   | Jul 27     | F   | 1 y  | French bulldog     | Rectal swab | Asymptomatic    | -       | -             | -    | -   | +     | -   |
| Dog 12               | CU21947   | Jul 27     | F   | 1 y  | French bulldog     | Rectal swab | Asymptomatic    | -       | -             | -    | -   | -     | -   |
| Dog 13               | CU21948   | Jul 27     | F   | 1 y  | French bulldog     | Rectal swab | Asymptomatic    | -       | -             | -    | -   | -     | -   |
| Dog 14               | CU21949   | Jul 27     | M   | 1 y  | French bulldog     | Rectal swab | Asymptomatic    | -       | -             | -    | -   | -     | -   |
| Dog 15               | CU21950   | Jul 27     | M   | 1 y  | French bulldog     | Rectal swab | Asymptomatic    | -       | -             | -    | -   | -     | -   |
| Dog 16               | CU21951   | Jul 27     | F   | 1 y  | French bulldog     | Rectal swab | Asymptomatic    | -       | -             | -    | -   | -     | -   |
| Dog 17†              | CU21952†  | Jul 27     | F   | 3 y  | French bulldog     | Rectal swab | Watery diarrhea | +       | + (29.6)      | -    | -   | -     | -   |
| Second visit, n = 24 |           |            |     |      |                    |             |                 |         |               |      |     |       |     |
| Puppy 1§             | CU22011   | Aug 18     | M   | 2 wk | French bulldog     | Rectal swab | Watery diarrhea | +       | + (30.5)      | -    | -   | -     | -   |
| Puppy 2              | CU22012   | Aug 18     | M   | 2 wk | French bulldog     | Rectal swab | Watery diarrhea | +       | + (30.1)      | -    | -   | -     | -   |
| Puppy 3              | CU22013   | Aug 18     | F   | 2 wk | French bulldog     | Rectal swab | Watery diarrhea | +       | + (31.4)      | -    | -   | -     | -   |
| Puppy 4              | CU22014   | Aug 18     | F   | 2 wk | French bulldog     | Rectal swab | Watery diarrhea | +       | + (30.7)      | -    | -   | -     | -   |
| Puppy 5              | CU22015   | Aug 18     | F   | 2 wk | French bulldog     | Rectal swab | Watery diarrhea | +       | + (31.8)      | -    | -   | -     | -   |
| Puppy 6              | CU22016   | Aug 18     | F   | 2 wk | French bulldog     | Rectal swab | Watery diarrhea | -       | -             | -    | -   | -     | -   |
| Dog 1                | CU22020   | Aug 18     | F   | 6 mo | French bulldog     | Rectal swab | Asymptomatic    | -       | -             | -    | -   | -     | -   |
| Dog 2                | CU22019   | Aug 18     | M   | 6 mo | French bulldog     | Rectal swab | Asymptomatic    | -       | + (36.0)      | -    | -   | -     | -   |
| Dog 3                | CU22018   | Aug 18     | F   | 2 y  | French bulldog     | Rectal swab | Asymptomatic    | -       | -             | -    | -   | -     | -   |
| Dog 4                | CU22034   | Aug 18     | F   | 1 y  | French bulldog     | Rectal swab | Asymptomatic    | -       | -             | -    | -   | -     | -   |
| Dog 5                | CU22022   | Aug 18     | F   | 3 y  | French bulldog     | Rectal swab | Asymptomatic    | -       | -             | -    | -   | -     | -   |
| Dog 6                | CU22026   | Aug 18     | F   | 1 y  | French bulldog     | Rectal swab | Asymptomatic    | -       | -             | -    | -   | -     | -   |
| Dog 7                | CU22021   | Aug 18     | F   | 1 y  | French bulldog     | Rectal swab | Asymptomatic    | -       | -             | -    | -   | -     | -   |
| Dog 8                | CU22025   | Aug 18     | F   | 1 y  | French bulldog     | Rectal swab | Asymptomatic    | -       | -             | -    | -   | -     | -   |
| Dog 9                | CU22023   | Aug 18     | F   | 1 y  | French bulldog     | Rectal swab | Asymptomatic    | -       | -             | -    | -   | -     | -   |
| Dog 10               | CU22029   | Aug 18     | F   | 1 y  | French bulldog     | Rectal swab | Asymptomatic    | -       | -             | -    | -   | -     | -   |
| Dog 11               | CU22030   | Aug 18     | F   | 1 y  | French bulldog     | Rectal swab | Asymptomatic    | -       | -             | -    | -   | -     | -   |
| Dog 12               | CU22024   | Aug 18     | F   | 1 y  | French bulldog     | Rectal swab | Asymptomatic    | -       | -             | -    | -   | -     | -   |
| Dog 13               | CU22031   | Aug 18     | F   | 1 y  | French bulldog     | Rectal swab | Asymptomatic    | -       | -             | -    | -   | -     | -   |
| Dog 14               | CU22028   | Aug 18     | M   | 1 y  | French bulldog     | Rectal swab | Asymptomatic    | -       | -             | -    | -   | -     | -   |
| Dog 15               | CU22032   | Aug 18     | M   | 1 y  | French bulldog     | Rectal swab | Asymptomatic    | -       | -             | -    | -   | -     | -   |
| Dog 16               | CU22027   | Aug 18     | F   | 1 y  | French bulldog     | Rectal swab | Asymptomatic    | -       | + (37.0)      | -    | -   | -     | -   |
| Dog 17†              | CU22033   | Aug 18     | F   | 3 y  | French bulldog     | Rectal swab | Asymptomatic    | -       | -             | -    | -   | -     | -   |
| Dog 18               | CU22017   | Aug 18     | F   | 5 y  | Miniature pinscher | Rectal swab | Asymptomatic    | -       | -             | -    | -   | -     | -   |

| Sample name          | Sample ID | Collection date | Sex | Age  | Breed              | Sample      | Clinical sign   | NoV RT-PCR | NoV real-time RT-PCR | CPV2 | RVA | CaCoV | CDV |
|----------------------|-----------|-----------------|-----|------|--------------------|-------------|-----------------|------------|----------------------|------|-----|-------|-----|
| Third visit, n = 9   |           |                 |     |      |                    |             |                 |            |                      |      |     |       |     |
| Human 1              | CU22080   | Aug 25          | M   | 2 y  | Not applicable     | Feces       | Asymptomatic    | +          | S (40.0)             | -    | -   | NA    | NA  |
| Human 2              | CU22081   | Aug 25          | M   | 8 mo | Not applicable     | Feces       | Asymptomatic    | +          | + (33.4)             | -    | -   | NA    | NA  |
| Puppy 1              | CU22072   | Aug 25          | M   | 3 wk | French bulldog     | Rectal swab | Watery diarrhea | +          | + (32.3)             | -    | -   | -     | -   |
| Puppy 2              | CU22073   | Aug 25          | M   | 3 wk | French bulldog     | Rectal swab | Watery diarrhea | +          | + (33.2)             | -    | -   | -     | -   |
| Puppy 3              | CU22074   | Aug 25          | F   | 3 wk | French bulldog     | Rectal swab | Watery diarrhea | +          | + (31.9)             | -    | -   | -     | -   |
| Puppy 4              | CU22075   | Aug 25          | F   | 3 wk | French bulldog     | Rectal swab | Watery diarrhea | +          | + (32.5)             | -    | -   | -     | -   |
| Puppy 5              | CU22076   | Aug 25          | F   | 3 wk | French bulldog     | Rectal swab | Watery diarrhea | +          | + (32.5)             | -    | -   | -     | -   |
| Puppy 6              | CU22078   | Aug 25          | F   | 3 wk | French bulldog     | Rectal swab | Watery diarrhea | -          | -                    | -    | -   | -     | -   |
| Dog 17*              | CU22079   | Aug 25          | F   | 3 y  | French bulldog     | Rectal swab | Asymptomatic    | -          | -                    | -    | -   | -     | -   |
| Fourth visit, n = 23 |           |                 |     |      |                    |             |                 |            |                      |      |     |       |     |
| Puppy 1§             | CU22143   | Sep 5           | M   | 1 mo | French bulldog     | Rectal swab | Asymptomatic    | -          | -                    | -    | -   | -     | -   |
| Puppy 2              | CU22144   | Sep 5           | M   | 1 mo | French bulldog     | Rectal swab | Asymptomatic    | -          | -                    | -    | -   | -     | -   |
| Puppy 3              | CU22145   | Sep 5           | F   | 1 mo | French bulldog     | Rectal swab | Asymptomatic    | -          | -                    | -    | -   | -     | -   |
| Puppy 4              | CU22146   | Sep 5           | F   | 1 mo | French bulldog     | Rectal swab | Asymptomatic    | -          | -                    | -    | -   | -     | -   |
| Puppy 5              | CU22147   | Sep 5           | F   | 1 mo | French bulldog     | Rectal swab | Asymptomatic    | -          | -                    | -    | -   | -     | -   |
| Puppy 6              | CU22148   | Sep 5           | F   | 1 mo | French bulldog     | Rectal swab | Asymptomatic    | -          | -                    | -    | -   | -     | -   |
| Dog 1                | CU22151   | Sep 5           | F   | 7 mo | French bulldog     | Rectal swab | Asymptomatic    | -          | -                    | -    | -   | -     | -   |
| Dog 2                | CU22150   | Sep 5           | M   | 7 mo | French bulldog     | Rectal swab | Asymptomatic    | -          | -                    | -    | -   | -     | -   |
| Dog 3                | CU22153   | Sep 5           | F   | 2 y  | French bulldog     | Rectal swab | Asymptomatic    | -          | NA                   | -    | -   | -     | -   |
| Dog 5                | CU22155   | Sep 5           | F   | 3 y  | French bulldog     | Rectal swab | Asymptomatic    | -          | -                    | -    | -   | -     | -   |
| Dog 6                | CU22161   | Sep 5           | F   | 1 y  | French bulldog     | Rectal swab | Asymptomatic    | -          | NA                   | -    | -   | -     | -   |
| Dog 7                | CU22156   | Sep 5           | F   | 1 y  | French bulldog     | Rectal swab | Asymptomatic    | -          | -                    | -    | -   | -     | -   |
| Dog 8                | CU22152   | Sep 5           | F   | 1 y  | French bulldog     | Rectal swab | Asymptomatic    | -          | -                    | -    | -   | -     | -   |
| Dog 9                | CU22157   | Sep 5           | F   | 1 y  | French bulldog     | Rectal swab | Asymptomatic    | -          | -                    | -    | -   | -     | -   |
| Dog 10               | CU22154   | Sep 5           | F   | 1 y  | French bulldog     | Rectal swab | Asymptomatic    | -          | -                    | -    | -   | -     | -   |
| Dog 11               | CU22158   | Sep 5           | F   | 1 y  | French bulldog     | Rectal swab | Asymptomatic    | -          | -                    | -    | -   | -     | -   |
| Dog 12               | CU22163   | Sep 5           | F   | 1 y  | French bulldog     | Rectal swab | Asymptomatic    | -          | NA                   | -    | -   | -     | -   |
| Dog 13               | CU22164   | Sep 5           | F   | 1 y  | French bulldog     | Rectal swab | Asymptomatic    | -          | NA                   | -    | -   | -     | -   |
| Dog 14               | CU22149   | Sep 5           | M   | 1 y  | French bulldog     | Rectal swab | Asymptomatic    | -          | NA                   | -    | -   | -     | -   |
| Dog 15               | CU22159   | Sep 5           | M   | 1 y  | French bulldog     | Rectal swab | Asymptomatic    | -          | NA                   | -    | -   | -     | -   |
| Dog 16               | CU22162   | Sep 5           | F   | 1 y  | French bulldog     | Rectal swab | Asymptomatic    | -          | NA                   | -    | -   | -     | -   |
| Dog 17‡              | CU22160   | Sep 5           | F   | 3 y  | French bulldog     | Rectal swab | Asymptomatic    | -          | NA                   | -    | -   | -     | -   |
| Dog 18               | CU22165   | Sep 5           | F   | 5 y  | Miniature pinscher | Rectal swab | Asymptomatic    | -          | NA                   | -    | -   | -     | -   |

\*Numbers in parentheses are cycle threshold values. CaCoV, canine coronavirus; CDV, canine distemper virus; CPV2, canine parvovirus 2; ID, identification; NA, not available; NoV, norovirus; RT-PCR, reverse transcription PCR; RVA, rotavirus A; +, positive; -, negative.

‡Samples were subjected to whole-genome sequencing.

‡Dog 17 was a bitch with 6 puppies.

§Puppies 1-6 were from the same litter of dog 17.

**Appendix Table 2.** Genetic analysis of nucleotide sequences of canine and human noroviruses from Thailand for antigenic epitopes (A–E) major capsid protein compared with those for other noroviruses\*

| Virus            | County/year | GenBank accession no. | Variant               | Antigenic epitopes |     |     |     |     |     |     |     |     |     |     |     |     |     |     |     |   |  |  |  |
|------------------|-------------|-----------------------|-----------------------|--------------------|-----|-----|-----|-----|-----|-----|-----|-----|-----|-----|-----|-----|-----|-----|-----|---|--|--|--|
|                  |             |                       |                       | A                  |     |     |     | B   |     |     |     | C   |     |     |     | D   |     |     |     | E |  |  |  |
|                  |             |                       |                       | 294                | 296 | 297 | 298 | 368 | 372 | 333 | 382 | 340 | 376 | 393 | 394 | 395 | 407 | 412 | 413 |   |  |  |  |
| Human            |             |                       |                       |                    |     |     |     |     |     |     |     |     |     |     |     |     |     |     |     |   |  |  |  |
| Lordsdale        | UK/1993     | X86557                | Bristol 1993          | A                  | S   | H   | D   | T   | N   | L   | K   | A   | Q   | D   | -†  | H   | N   | T   | G   |   |  |  |  |
| Camberwell       | AU/1994     | AF145896              | Camberwell 1994       | V                  | S   | H   | D   | T   | N   | L   | K   | A   | Q   | D   | -†  | H   | N   | T   | G   |   |  |  |  |
| Farmington Hills | USA/ 2002   | AY502023              | Farmington Hills 2002 | A                  | T   | H   | N   | N   | N   | M   | K   | G   | E   | N   | G   | T   | S   | T   | G   |   |  |  |  |
| Hunter504D/040   | AU/2004     | DQ078814              | Hunter 2004           | A                  | T   | Q   | N   | S   | S   | V   | R   | R   | E   | S   | T   | T   | D   | D   | S   |   |  |  |  |
| CGMH09           | TW/2006     | JN400607              | Den Haag 2006b        | A                  | S   | R   | N   | S   | E   | V   | K   | G   | E   | S   | T   | T   | S   | N   | V   |   |  |  |  |
| JB-15            | KOR/2015    | HQ009513              | Apeldoorn 2008        | T                  | S   | R   | N   | A   | D   | V   | K   | A   | D   | N   | T   | A   | S   | N   | S   |   |  |  |  |
| New Orleans1805  | USA/2009    | GU445325              | New Orleans 2009      | P                  | S   | R   | N   | A   | D   | V   | K   | T   | E   | S   | T   | T   | S   | N   | I   |   |  |  |  |
| NSW0514          | AU/2012     | JX459908              | Sydney 2012           | T                  | S   | R   | N   | E   | D   | V   | K   | T   | E   | G   | T   | T   | S   | N   | T   |   |  |  |  |
| JN010            | CHN/2017    | MG214988              | Sydney 2012           | T                  | S   | H   | N   | E   | N   | M   | K   | T   | E   | G   | T   | T   | S   | N   | T   |   |  |  |  |
| DBM15–156        | THA/2015    | MG786781              | Sydney 2012           | T                  | S   | R   | N   | E   | D   | M   | K   | T   | E   | S   | T   | T   | S   | N   | T   |   |  |  |  |
| HuNoV/CU21953    | THA/2018    | This study            | Sydney 2012           | T                  | S   | H   | N   | E   | N   | M   | K   | T   | E   | G   | T   | T   | S   | N   | T   |   |  |  |  |
| HuNoV/CU21954    | THA/2018    | This study            | Sydney 2012           | T                  | S   | H   | N   | E   | N   | M   | K   | T   | E   | G   | T   | T   | S   | N   | T   |   |  |  |  |
| Canine           |             |                       |                       |                    |     |     |     |     |     |     |     |     |     |     |     |     |     |     |     |   |  |  |  |
| CaNoV/CU21952    | THA/2018    | This study            | Sydney 2012           | T                  | S   | H   | N   | E   | N   | M   | K   | T   | E   | G   | T   | T   | S   | N   | T   |   |  |  |  |
| CaNoV/CU21939    | THA/2018    | This study            | Sydney 2012           | T                  | S   | H   | N   | E   | N   | M   | K   | T   | E   | G   | T   | T   | S   | N   | T   |   |  |  |  |

\*AU, Australia; CaNoV, canine norovirus; HuNoV, human norovirus; KOR, South Korea; THA, Thailand; TW, Taiwan.

†-, Gap at position 394.



**Appendix Table 3.** Pairwise comparisons of nucleotides and amino acids of canine norovirus CU21939 from Thailand with those of reference noroviruses\*

| Virus             | Host  | Genotype†    | Country/year   | GenBank accession no. | Variant‡       | Nucleotide (amino acid) identity, % |                 |                 |                 |
|-------------------|-------|--------------|----------------|-----------------------|----------------|-------------------------------------|-----------------|-----------------|-----------------|
|                   |       |              |                |                       |                | WGS 1–7564‡                         | ORF1 5–5104‡    | ORF2 5085–6707‡ | ORF3 6707–7513‡ |
| Canine            |       |              |                |                       |                |                                     |                 |                 |                 |
| AN843             | Dog   | GIV.2        | USA/2011       | MK067289              | NA             | NA                                  | 62.20 (47.80)§  | 55.30 (38.80)   | 50.90 (41.40)   |
| 170/07            | Dog   | GIV.2        | Italy/2007     | EU224456              | NA             | NA                                  | 64.50 (71.20)¶  | 54.20 (36.50)   | 51.40 (42.90)   |
| AN1610            | Dog   | GIV.2        | USA/2017       | MK067288              | NA             | NA                                  | 62.30 (47.8)§   | 55.20 (38.10)   | 51.10 (42.00)   |
| AN1663            | Dog   | GIV.2        | USA/2017       | MK067291              | NA             | NA                                  | 62.30 (47.8)§   | 55.10 (38.30)   | 51.20 (41.70)   |
| AN1638            | Dog   | GIV.2        | USA/2017       | MK067290              | NA             | NA                                  | 62.60 (48.40)§  | 55.10 (38.30)   | 51.20 (41.70)   |
| C33/Viseu         | Dog   | GVI.2        | Portugal/2007  | GQ443611              | NA             | NA                                  | 64.90 (72.10)   | 53.90 (39.10)   | 53.90 (46.50)   |
| FD53              | Dog   | GVI.2        | UK/2007        | JF930689              | NA             | NA                                  | 64.20 (71.20)¶  | 54.40 (39.10)   | 54.20 (46.50)   |
| FD210             | Dog   | GVI.1        | Italy /2007    | JF939046              | NA             | NA                                  | 65.10 (70.80)¶  | 54.30 (38.60)   | 54.20 (44.10)   |
| AN1633            | Dog   | GVI.1        | USA/2017       | MK067293              | NA             | NA                                  | 62.60 (48.40)§  | 55.50 (40.60)   | 53.10 (43.50)   |
| AN1632            | Dog   | GVI.1        | USA/2017       | MK067292              | NA             | NA                                  | 62.40 (47.80)§  | 55.50 (40.60)   | 53.10 (43.50)   |
| ITA/91            | Dog   | GVI.1        | Italy /2007    | FJ875027              | NA             | NA                                  | 65.10 (71.20)¶  | 55.00 (39.90)   | 53.40 (43.80)   |
| 63.15             | Dog   | GVI.2        | Italy /2015    | KY486329              | NA             | NA                                  | 65.10 (72.10)¶  | 54.20 (38.80)   | 55.20 (46.20)   |
| AN1640            | Dog   | GVI.2        | USA/2017       | MK067295              | NA             | NA                                  | 62.40 (47.80)§  | 54.20 (38.90)   | 54.5 (44.70)    |
| HKU Ca026F        | Dog   | GVII         | China/2007     | FJ692500              | NA             | 58.50 (47.20)                       | 62.20 (55.00)   | 52.90 (37.90)   | 43.80 (33.00)   |
| HKU Ca035F        | Dog   | GVII         | China/2007     | FJ692501              | NA             | 58.50 (47.30)                       | 62.20 (55.00)   | 52.90 (38.10)   | 43.80 (33.00)   |
| 1C-09             | Dog   | GII.4        | Finland/2009   | JF746890              | Unclassified   | NA                                  | NA              | 91.60 (91.60)#  | NA              |
| 261–10            | Dog   | GII.4        | Finland /2010  | JF746891              | Unclassified   | NA                                  | NA              | 91.60 (91.60)#  | NA              |
| 3–09              | Dog   | GII.4        | Finland /2009  | JF746892              | Den Haag 2006b | NA                                  | NA              | 91.60 (97.40)#  | NA              |
| Human             |       |              |                |                       |                |                                     |                 |                 |                 |
| HuNoV/OC07138     | Human | GII.Pe-GII.4 | Japan/2007     | AB434770              | Osaka 2007     | NA                                  | 94.80 (98.50)** | 89.60 (94.60)   | 99.00 (98.90)   |
| HuNov/NSW001P     | Human | GII.Pe-GII.4 | USA/2008       | GQ845367              | New Orleans    | 89.10 (94.50)                       | 94.50 (86.50)   | 94.10 (93.90)   | 93.60 (96.30)   |
| HuNoV/New Orleans | Human | GII.P4-GII.4 | USA/2009       | GU445325              | New Orleans    | 89.00 (94.70)                       | 94.70 (86.70)   | 94.30 (93.70)   | 93.7 (96.10)    |
| HuNoV/NSW0514     | Human | GII.Pe-GII.4 | Australia/2012 | JX459908              | Sydney 2012    | 97.6 (98.70)                        | 98.70 (97.70)   | 99.20 (97.40)   | 97.00 (98.00)   |
| HuNoV/CUHK3630    | Human | GII.Pe-GII.4 | China/2012     | KC175323              | Sydney 2012    | 98.20 (99.20)                       | 99.20 (98.20)   | 99.50 (98.10)   | 98.00 (98.50)   |
| HuNoV/JN010       | Human | GII.Pe-GII.4 | China/2017     | MG214988              | Sydney 2012    | 99.00 (99.50)                       | 99.50 (99.00)   | 99.60 (99.00)   | 98.90 (99.4)    |
| HuNoV/DBM15–156   | Human | GII.Pe-GII.4 | Thailand/2015  | MG786781              | Sydney 2012    | 97.40 (98.80)                       | 97.50 (99.50)§  | 97.50 (98.50)   | 95.90 (95.20)   |
| HuNoV /CU21953    | Human | GII.Pe-GII.4 | Thailand/2018  | This study            | Sydney 2012    | 99.90 (99.80)                       | 99.80 (100)     | 99.90 (100.00)  | 99.90 (99.80)   |
| HuNoV /CU21954    | Human | GII.Pe-GII.4 | Thailand/2018  | This study            | Sydney 2012    | 99.90 (99.80)                       | 99.80 (100)     | 99.90 (100.00)  | 99.90 (99.80)   |
| CaNoV/CU21952     | Dog   | GII.Pe-GII.4 | Thailand/2018  | This study            | Sydney 2012    | 99.90 (99.80)                       | 99.80 (100)     | 99.80 (99.80)   | 99.9 (99.60)    |
| CaNoV/CU21939     | Dog   | GII.Pe-GII.4 | Thailand/2018  | This study            | Sydney 2012    | 100.00 (100.00)                     | 100.00 (100.00) | 100.00 (100.00) | 100.00 (100.00) |

\*CaNoV, canine norovirus; HuNoV, human norovirus; NA, not available; ORF, open reading frame; WGS, whole-genome sequencing.

†Genotype classification by the Norovirus Genotype Tool (<https://www.rivm.nl/mpf/typingtool/norovir>).

‡Norovirus strain NSW0514 (JX459908) was used as a reference. Values are basepairs.

§Size of the ORF1 gene for genetic comparison is 5,088 bp.

¶Size of the ORF1 gene for genetic comparison is 699 bp.

#Size of the ORF2 gene for genetic comparison is 228 bp.

\*\*Size of the ORF1 gene for genetic comparison is 805 bp.

**Appendix Table 4.** Primers for identification and sequencing of noroviruses, Thailand\*

| Primer      | Sequence, 5'→3'                               | Position | Target | Reference  |
|-------------|-----------------------------------------------|----------|--------|------------|
| F4895       | GATTTAGGTGACACTATAGYDSTT YTCHTTYTAYGGKAYGATGA | 4585     | RdRp   | (1)        |
| R5591       | AWTCGGGCARGAGATYGCGATC                        | 5078     | RdRp   |            |
| G2SKR       | CCRCCNGCATRHCCRTTRTACAT                       | 5389     | VP1    | (2)        |
| NOV-ORF1-1F | GTGAATGAAGATGGCSTCTAACG                       | 1        | ORF1   | This study |
| NOV-ORF1-1R | CCTGTTCCAATCCTGGTACG                          | 705      | ORF1   | This study |
| NOV-ORF1-2F | TCTCTCCAGACACTCTTAGG                          | 572      | ORF1   | This study |
| NOV-ORF1-2R | GCATCCTCGATGGAYCTCAC                          | 1233     | ORF1   | This study |
| NOV-ORF1-3F | TAGGTTTGGTGCTAGGATTTAC                        | 1065     | ORF1   | This study |
| NOV-ORF1-3R | CCTTTGTTCTCAATTCTGTC                          | 1740     | ORF1   | This study |
| NOV-ORF1-4F | CAGCGYTRGGYCTTATCC                            | 1580     | ORF1   | This study |
| NOV-ORF1-4R | CTGACATRGCTTTGACATCCTT                        | 2208     | ORF1   | This study |
| NOV-ORF1-5F | GAGCATCAGGGTTACTCCATG                         | 2066     | ORF1   | This study |
| NOV-ORF1-5R | CTCTTGTACTCRTCGTACTCCTCAT                     | 2700     | ORF1   | This study |
| NOV-ORF1-6F | CACAGAAGAGATGGCCAACA                          | 2561     | ORF1   | This study |
| NOV-ORF1-6R | CTAGAATCATGCCCGTACATC                         | 3227     | ORF1   | This study |
| NOV-ORF1-7F | CTGGTCGCGGATAGTCAACT                          | 3062     | ORF1   | This study |
| NOV-ORF1-7R | TTCTTTCCCTCTTCAAACATTAGG                      | 4038     | ORF1   | This study |
| NOV-ORF1-8F | TCAARGGTGGCCCTTCATTGC                         | 3726     | ORF1   | This study |
| NOV-ORF1-8R | AAGGGAGTTGGCCTGAATGAT                         | 4561     | ORF1   | This study |
| NOV-ORF1-9F | CAGAACCACACCTGGCCCAG                          | 4371     | ORF1   | This study |
| NOV-ORF1-9R | GTCAATTACATTTTGTGGCCCGC                       | 5210     | ORF1   | This study |
| NOV-ORF2-1F | AGACAAGAGCCAATGTTTCAG                         | 5004     | ORF2   | This study |
| NOV-ORF2-1R | GTGCCTAGGAGCACGCCATCAG                        | 5887     | ORF2   | This study |
| NOV-ORF2-2F | TGAGGAGATGACCAATTCAAGA                        | 5787     | ORF2   | This study |
| NOV-ORF2-2R | ATCCAGCAAAGAAAGCTCCAGC                        | 6709     | ORF2   | This study |
| NOV-ORF3-1F | AGGTTTGATTCTGGGTAAACCAG                       | 6630     | ORF3   | This study |
| NOV-ORF3-1R | CGTGACTCCCCYCGCTTACG                          | 7487     | ORF3   | This study |
| VN3T20      | GAGTGACCGCGCCGCT20                            |          | Poly A | (10)       |

\*NOV, norovirus; ORF, open reading frame; RdRp, RNA-dependent RNA polymerase; VP, viral protein.

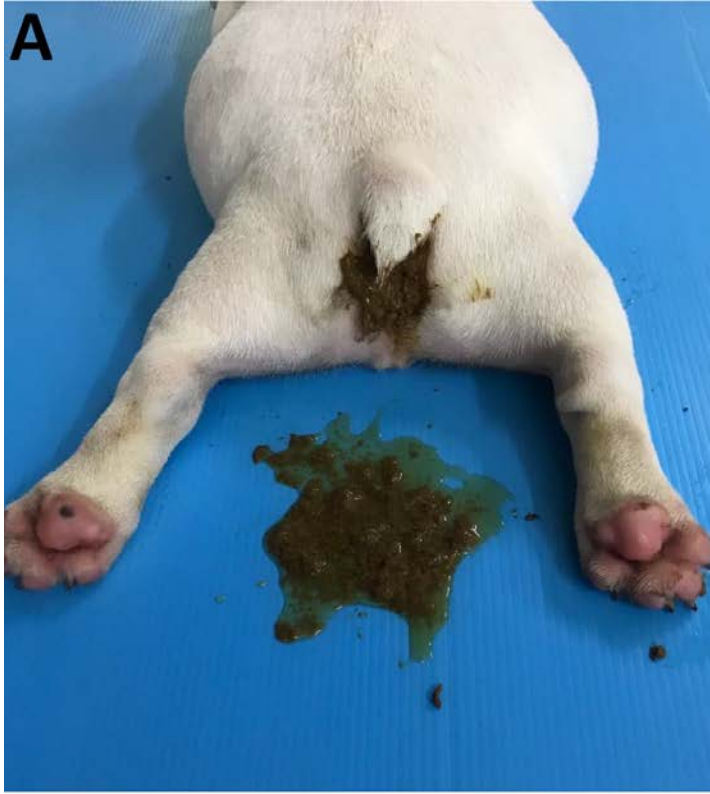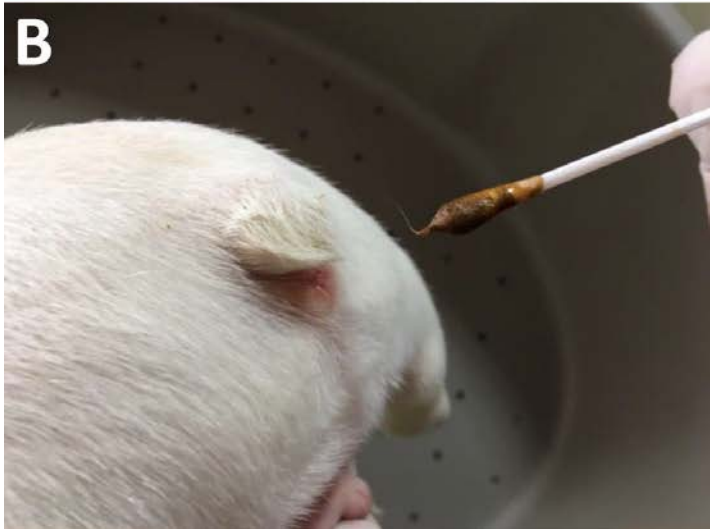

**Appendix Figure 1.** Human norovirus infection in dogs, Thailand. A) Diarrhea. B) Collection of fecal sample.

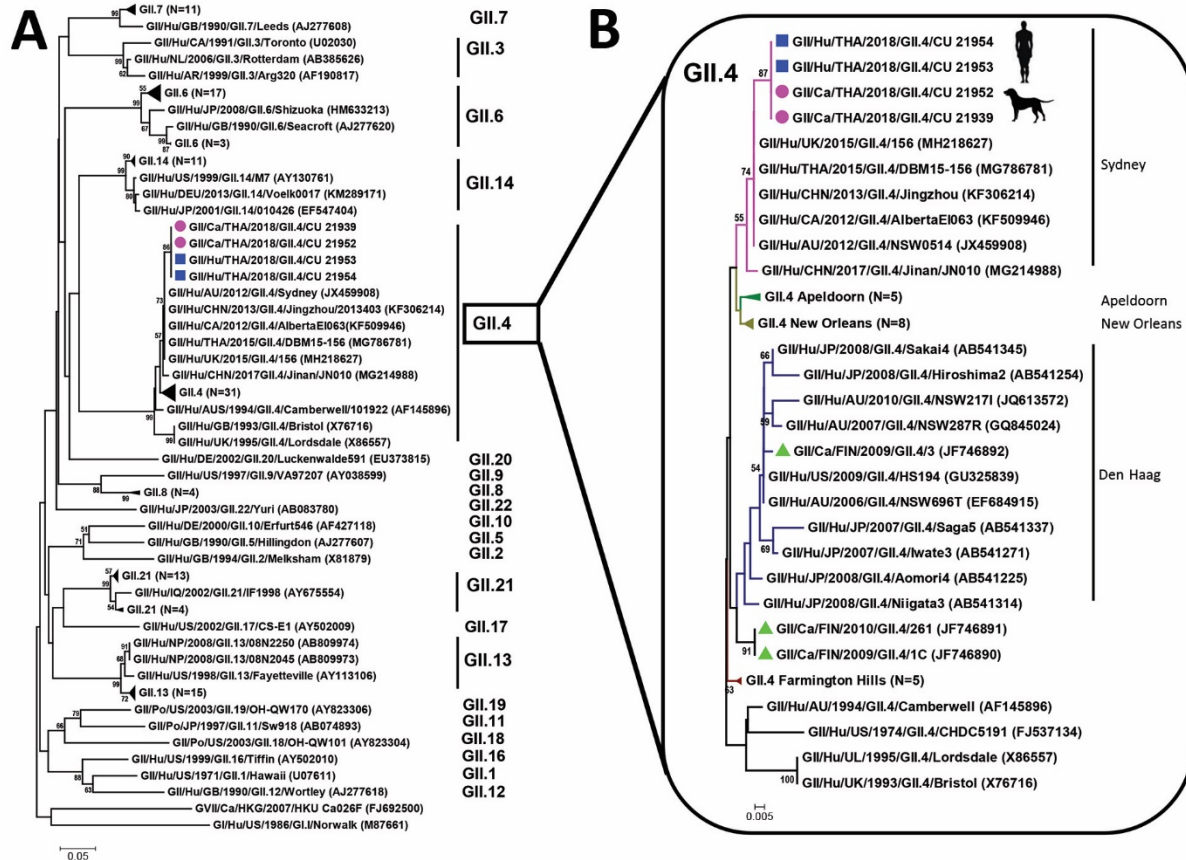

**Appendix Figure 2.** A) Phylogenetic tree of ORF2 of noroviruses. B) Phylogenetic tree of ORF2 of GII.4 noroviruses. Red circles indicate canine noroviruses from Thailand, green triangles indicate canine noroviruses from Finland, and blue squares indicate human noroviruses from Thailand. Trees were constructed by using MEGA version 7.026 (<https://www.megasoftware.net>) with the neighbor-joining algorithm and bootstrap analysis with 1,000 replications. Numbers along branches are bootstrap values, and numbers on the right of panel A indicate genogroups. Scale bars indicate nucleotide substitutions per site. ORF, open reading frame.
